# Supplementary material for: A hypomorphic cystathionine ß-synthase gene contributes to cavefish eye loss by disrupting optic vasculature
Source: PubMed Central journal article supplement (PMC7265459; doi:10.1038/s41467-020-16497-x), 2020-06-02
Supplement: 41467_2020_16497_MOESM1_ESM.pdf [file 41467_2020_16497_MOESM1_ESM.pdf]

**A Hypomorphic *Cystathionine  $\beta$ -Synthase* Gene Contributes to Cavefish Eye Loss by Disrupting Optic Vasculature**

**Ma et al.**

**Supplementary Figures and Legends**

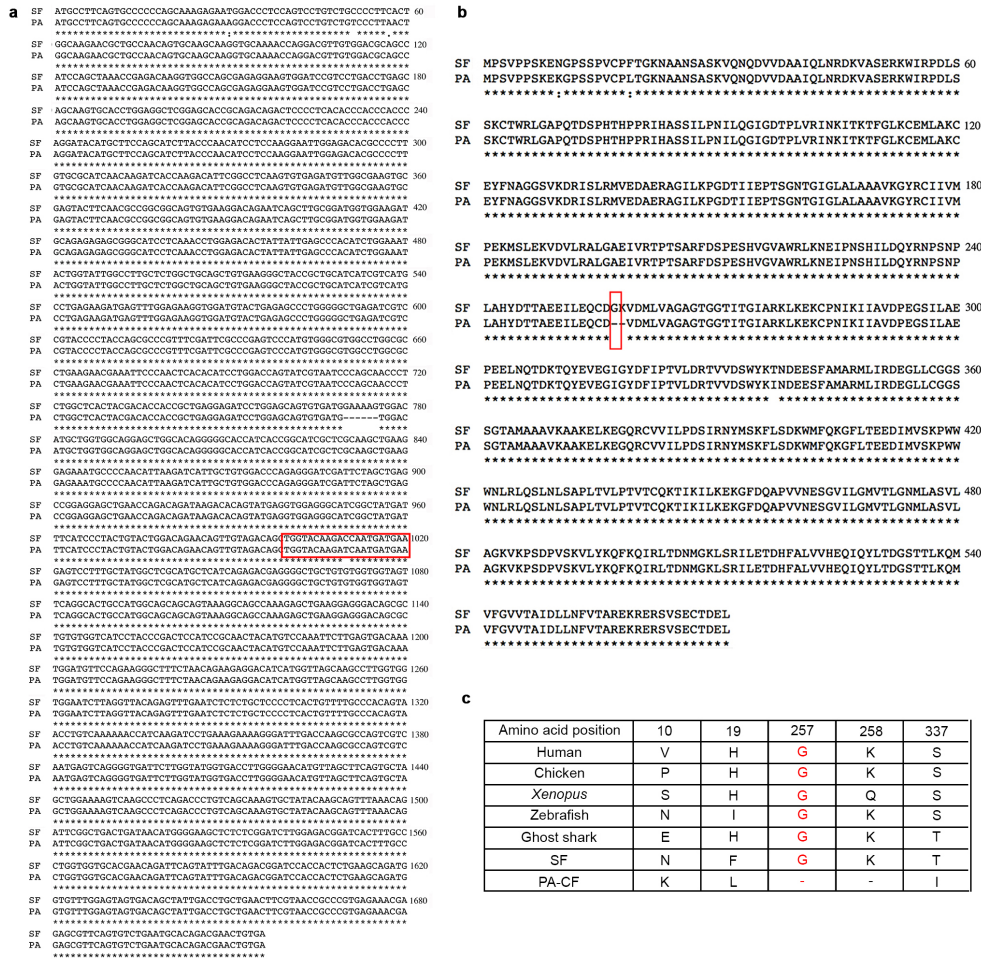

**Supplementary Fig. 1: Nucleotide and protein sequence of the *csba* genes. (a)** Nucleotide sequence alignments of the SF and PA-CF *csba* genes. Asterisks: identical nucleotides. Spaces, or - - - show different nucleotides or deletions respectively. The region complementary to the sequence used to identify the SF and PA-CF alleles in the F1 hybrid test, including the SNP marker (Fig. 3a), is boxed in red. **(b)** Deduced amino acid sequence alignment of the SF and PA-CF CBSA proteins. Asterisks: identical amino acids. or - - - different amino acids or deletions respectively. The amino acid that is conserved in vertebrates and SF but absent in PA-CF CBSA (G-257) is boxed in red. **(c)** Comparison of divergent amino acid sites in SF and PA-CF CBSA to conserved amino acids at the same position in zebrafish CBSA or other vertebrate CBS proteins. Variable amino acid sites are indicated in black type. The conserved amino acid site (G-257) is indicated in red. Dashes indicate missing amino acids in PA-CF CBSA.

```

                SF AATAC--AAAAAAAGTTTTTTTTTTTTG
                PA-CF AATACAAAAAAAAAGTTGTTTTTTTTTTG
                TI-CF AATACAAAAAAAAAGTTGTTTTTTTTTTG
                LS-CF AATACAAAAAAAAAGTTGTTTTTTTTTTG
                CH-CF AATACAAAAAAAAAGTTGTTTTTTTTTTG
                MO-CF AATACAAAAAAAAACG----TTTTTTTTTTG
                JI-CF AATACAAAAAAAAACG----TTTTTTTTTTG

PA-CF TATTATTAATTATTATACAAATACA AAAAAAGTTGTTTTTTTTTTGTAATCTTTTAT
      SF TATTATTAATTATTATACAAATAC--AAAAAGTTTTTTTTTTTTTGTAATCTTTTAT

PA-CF tttttCCATATTACATGGCTTATGGAAATCATCAGATTTATTGCCTTGAAATTAATTAGT
      SF TTTTTCATATTACATGGCTTATGGAAATCATCAGATTTATTGCCTTGAAATTAATTAGT

PA-CF TCTGTACTCCTGTTGAGTAA CCACTGGTTGTCCAGTTGTGAAGAGTGACCAGCCTTCT
      SF TCTGTACTCCTGTTGAGTAA CCACTGGTTGTCCAGTTGTGAAGAGTGACCAGCCTTCT

PA-CF TTGGCTCGTGTTTCTAACAGGCCTACGCAATCCACAGTGTGATGGCAGATGTTATAGT
      SF TTGGCTCGTGTTTCTAACAGGCCTACGCAATCCACAGTGTGATGGCAGATGTTATAGT

PA-CF GTACTTGTTTTGGGCCTCAGCCAAGGCCAGCTGTGACGCATGTGTCTCTCTACACATTTA
      SF GTACTTGTTTTGGGCCTCAGCCAAGGCCAGCTGTGACGCATGTGTCTCTCTACACATTTA

PA-CF AACCTTTAAAGGCCTTTACAGCTCCACCCTCCAGTGGCACGTGGGTTACTTTAGGG
      SF AACCTTTAAAGGCCTTTACAGCTCCACCCTCCAGCGGCACGTGGGTTACTTTAGGG

                SF TCCAGCGGCACGTGGGTTACTTTAGGG
                PA-CF TCCAGTGGCACGTGGGTTACTTTAGGG
                TI-CF TCCAGTGGCACGTGGGTTACTTTAGGG
                LS-CF TCCAGTGGCACGTGGGTTACTTTAGGG
                CH-CF TCCAGTGGCACGTGGGTTACTTTAGGG
                MO-CF TCCAGCGGCACGTGGGTTACTTTAGGG
                JI-CF TCCAGCGGCACGTGGGTTACTTTAGGG

```

**Supplementary Fig. 2: Indels in the E Region of the Cavefish *cbbsa* gene.** Alignment of the E region of SF and PA-CF and SF showing indels. Boxed regions and aligned sequences above or below: indels (red) shared in six different CF populations.

```

SF TATTATTAATTATTATACAAATAC--AAAAAAGTTT TTTTTTTTTTGTAAATCTTTTTAT
|||
PA-CF TATTATTAATTATTATACAAATACAA AAAAAAAGTTG TTTTTTTTTTGTAAATCTTTTTAT
|||
FOXM1 AGTTG TTTTTTTT
BR-C Z3 AGTTG TTTTTTTT
FOXM1b GTTG TTTTTTTT
Sox2 GTTG TTTTTTTT
c-Myb AAAAGTTG
Elf-1 AAGTTG TTTTTTTT
FOXM1a GTTG TTTTTTTT
PR B GTTG TTTTTTTT
PR A GTTG TTTTTTTT
GR-alpha TTG TTTTTTTT
GR-beta TG TTTTTTTT
HNF-3alpha TTG TTTTTTTT
HNF-3beta TG TTTTTTTT
GR TG TTTTTTTT

A TTTTAG POU3F1
TA TTTT unc-86
TTA TTTTAG HNF-3alpha
GGGTTA T HOXD8
TGGGTTA T TTT IPF1
A TTTTA Cut11
A TTTTA AGL3
E12 TCCAGCGGC TTA TTTT Pax-4a
OSBZ8 GCGGCACGTGGGT A TTTT POU1F1a
f(alpha)-f(epsilon) AGCGGC TTA TTTT BR-C Z2
ZF5 CG GTTA TTT POU3F2
Pax-5 TCCAGCG GGTTA TTTT FOXP3
DEC1 AGCGGCACGTGG TAT TTTTAG Nkx6-2
E2F-1 AGCGGCA GGGTTA TTTTAG aMEF-2

SF AACCTTTAAAGGCCTTTACAGCTCCACCCTCCAGCGGCACGTGGGTTA TTTAGGG
|||
PA-CF AACCTTTAAAGGCCTTTACAGCTCCACCCTCCAGTGGCACGTGGGTTA CTTTAGGG
|||
Vpr CCAGTGGC GTTAC TTTA Hif
Pax-2a CCAGTGG
USF-1 CCAGTGG
DEC1 AGTGGCACGTGG
NF-1 GTGGC
HIF-1 GTGGCACGT
Max GTGGCACGTGG
ENKTF-1 TGGCACGT

```

**Supplementary Fig. 3: Predicted transcription factor binding sites in the E region.** Predicted transcription factor binding sites specific for SF or PA-CF indels in 5' (top) and 3' (bottom) parts of the E region of the *cbasa* genes. Predicted transcription factors and binding sites specific for SF sequences are shown on top of the alignments and for the mutated PA-CF sequences at the bottom of the alignments. Predicted transcription factors that are unchanged between SF and PA-CF are not shown. Critical indels resulting in changed transcription factor binding sites are indicated in red.

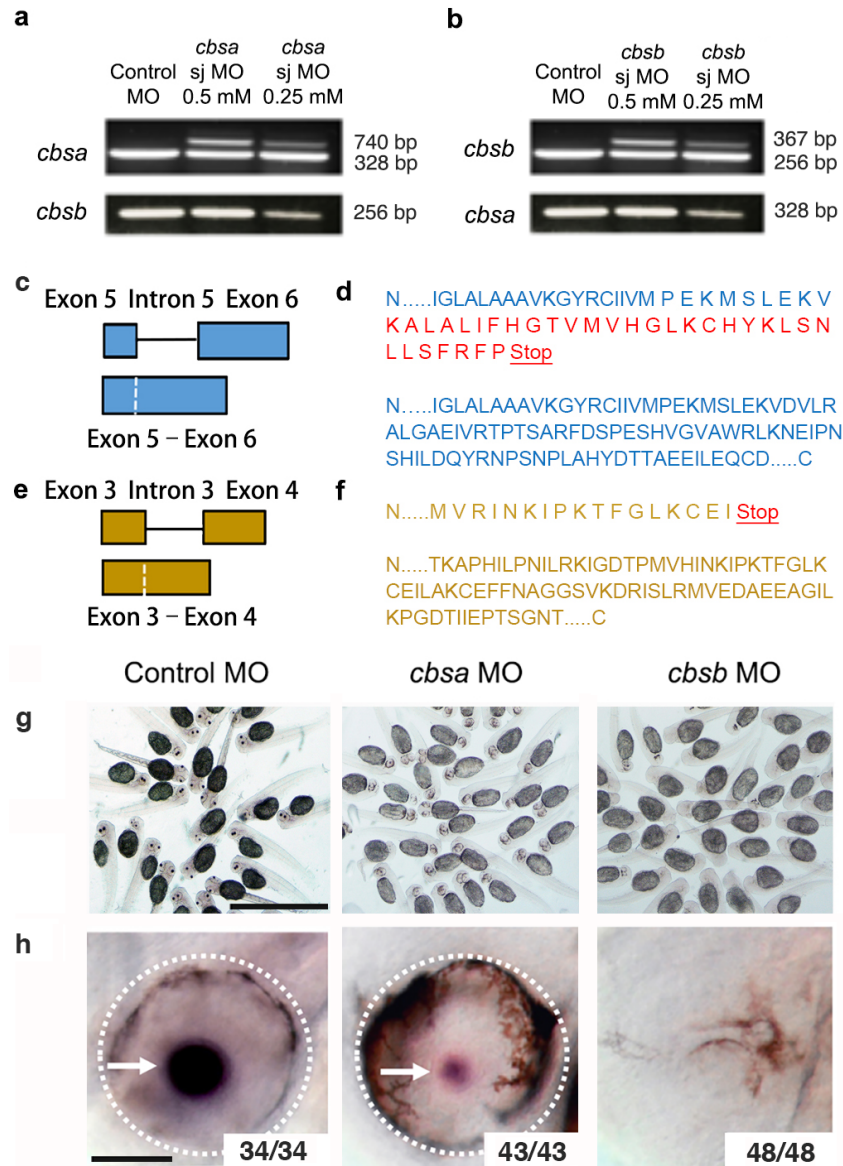

**Supplementary Fig. 4: Controls for morpholino based *cbs* gene knockdown.** (a-e) Validations by RT-PCR showing *cbsa* and *cbsb* expression in morphants produced by injection of 0.5 mM or 0.25 mM *cbsa* (top) or *cbsb* (bottom) MOs into SF eggs. The upper bands in the *cbsa* and *cbsb* MO lanes are PCR products from pre-mRNAs containing unprocessed *cbsa* or *cbsa* introns including translation stop sites (see d, f below). The lower bands are PCR products from processed mRNAs. (c, e) Diagrams of the *cbsa* (top, blue) and *cbsb* (bottom, yellow) intron-exon boundary regions (top) and processed exons (bottom) targeted by *cbsa* and *cbsb* splice junction MOs. (d, f) Deduced amino acid sequences of *cbs* of sequenced upper and lower PCR products in a and b. The deduced amino acid sequences of PCR products from the *cbsa* and *cbsb* upper transcripts both contain unprocessed stop codons in introns that would lead to premature translation termination. *cbsa* exons: blue letters. *cbsb* exons: yellow letters.

Introns and translation termination (stop) sites: red letters. (**g**, **h**). Control, *cbsa*, and *cbsb* morphants (0.5 mM) *in situ* hybridized with a *cryaa* probe at 40 hpf to detect the lens (when present). Upper rows: small groups of *cryaa* stained morphants. Scale bar in g is 1.25 mm; magnification is the same across the upper row. Bottom row: single typical *cryaa* stained morphants. Dashed outlines (eyes). Arrows: lens. Control morphants show normal eyes with *cryaa* stained lenses, *cbsa* morphants showing mostly abnormal eyes with reduced *cryaa* stained lenses, and *cbsb* morphants mostly lacking eyes and *cryaa* stained lenses. Insets: The n of indicated result/total number for g and h. Scale bar in h: 100  $\mu$ m; magnification is the same across the bottom row. Source data are provided as a source data file.

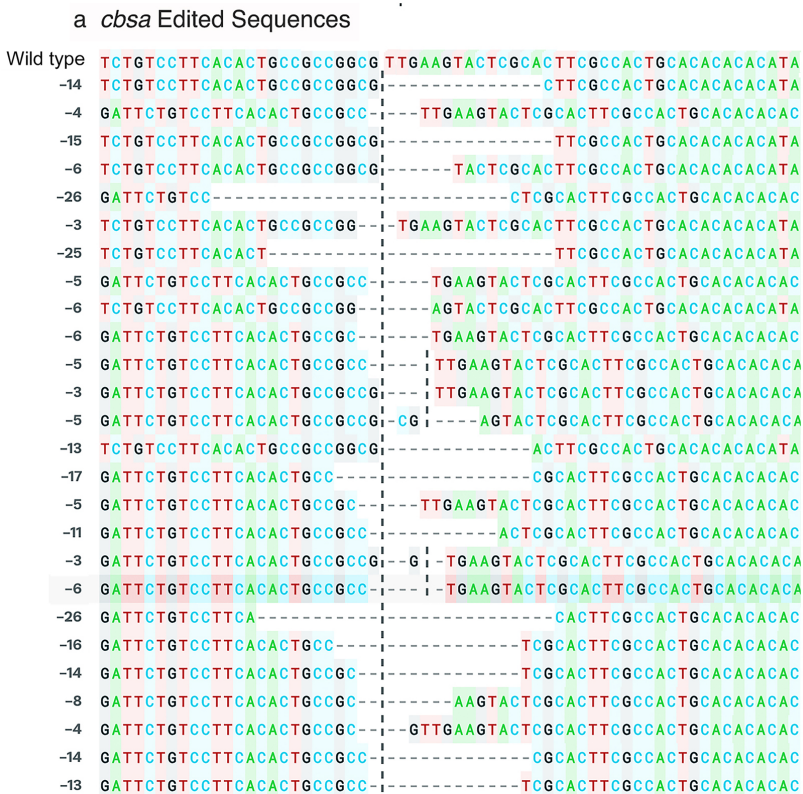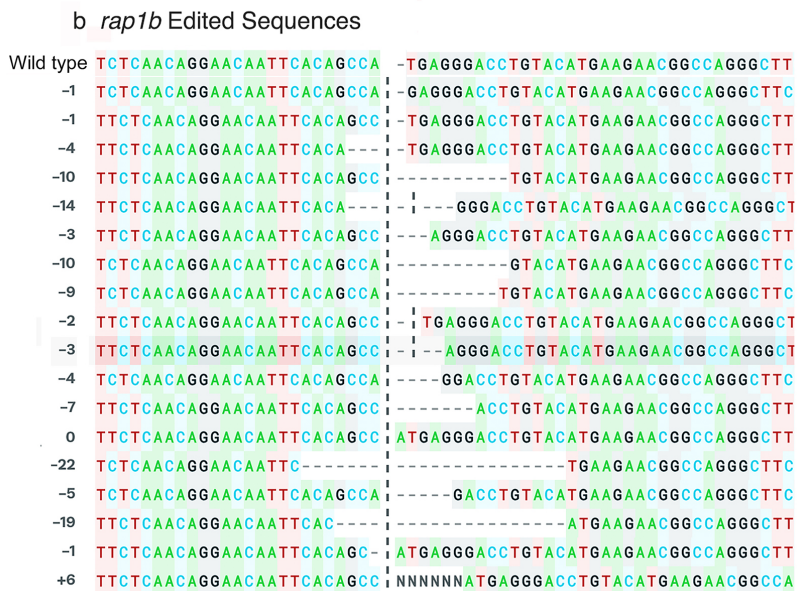

**Supplementary Fig. 5: Summary of *cbas* (a) and *rap1b* (b) CRISPR/Cas9 mutations.** The number of deleted nucleotides in each mutation is shown on the left. Dashed vertical lines indicate the beginning of the guide RNAs. Sequences are shown from 5' (left) to 3' (right).

## Supplementary Tables

**Supplementary Table 1.** The presence (+) or absence (-) of indels in *cbssa* introns 6 and 8 in different CF populations compared to SF.

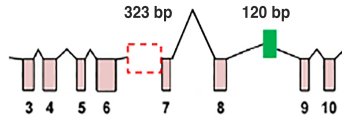

| Cavefish Type | Intron 6<br>323 bp<br>deletion<br>indel | Intron 8<br>120 bp insertion<br>indel |
|---------------|-----------------------------------------|---------------------------------------|
| PA-CF         | +                                       | +                                     |
| TI-CF         | +                                       | +                                     |
| LS-CF         | +                                       | +                                     |
| CH-CF         | +                                       | +                                     |
| MO-CF         | -                                       | -                                     |
| JI-CF         | -                                       | -                                     |



**Supplementary Table 2.** Effects of homocysteine (hCys) or cysteine (Cys) injection into SF eggs on eye morphology at 40 hpf. See Materials and Methods for description of morphological categories.

| Egg injection | Total number | Number normal eyes | Number small or absent eyes | Percent small or absent eyes (%) |
|---------------|--------------|--------------------|-----------------------------|----------------------------------|
| Cys           | 28           | 27                 | 1                           | 3.57                             |
| hCys          | 166          | 128                | 38                          | 22.89                            |

**Supplementary Table 3.** Effects of *cbs* morpholino injection into SF eggs on eye morphology at 40 hpf. See Materials and Methods for description of morphological categories.

| Morpholino(s)    | Total number | Number normal eyes | Percent normal eyes (%) | Number small eyes with ventrally displaced lens | Percent small eyes (%) | Number absent eyes | Percent absent eyes (%) |
|------------------|--------------|--------------------|-------------------------|-------------------------------------------------|------------------------|--------------------|-------------------------|
| Control          | 450          | 437                | 97.1                    | 10                                              | 2.2                    | 3                  | 0.7                     |
| <i>cbsa</i>      | 907          | 526                | 58.0                    | 357                                             | 39.4                   | 24                 | 2.6                     |
| <i>cbsb</i>      | 235          | 7                  | 3.0                     | 35                                              | 14.9                   | 193                | 82.1                    |
| <i>cbsa+cbsb</i> | 61           | 2                  | 3.3                     | 5                                               | 8.2                    | 54                 | 88.5                    |

**Supplementary Table 4.** Effects of *cbs* morpholino and *cbsa* mRNA injection into SF eggs on eye morphology at 40 hpf. See Materials and Methods for description of morphological categories.

| Injection                         | Total number | Number normal eyes | Percent normal eyes (%) | Number small eyes with ventrally displaced lens | Percent small eyes (%) | Number of absent eyes | Percent of absent eyes (%) |
|-----------------------------------|--------------|--------------------|-------------------------|-------------------------------------------------|------------------------|-----------------------|----------------------------|
| <i>cbsa</i> MO                    | 28           | 8                  | 28.6                    | 16                                              | 57.1                   | 4                     | 14.3                       |
| <i>cbsa</i> MO + <i>cbsa</i> mRNA | 40           | 34                 | 85.0                    | 4                                               | 10.0                   | 2                     | 5.0                        |
| <i>cbsb</i> MO                    | 48           | 2                  | 4.2                     | 10                                              | 20.8                   | 36                    | 75.0                       |
| <i>cbsb</i> MO + <i>cbsa</i> mRNA | 45           | 0                  | 0                       | 32                                              | 71.1                   | 13                    | 28.9                       |

**Supplementary Table 5.** Gene models and ID numbers of protein coding genes on scaffold KB871589.1 in the Ensembl AstMex102 genome assembly and primers used for screening for gene expression levels in SF and PA-CF at 40 hpf by qualitative RT-PCR.

| Gene name        | Ensembl version gene ID             | Forward primer (5'-3')         | Reverse primer (5'-3')         |
|------------------|-------------------------------------|--------------------------------|--------------------------------|
| <i>arhgap6-2</i> | <a href="#">ENSAMXG00000007866</a>  | TCACCATCCCCAAA<br>GATGGC       | GGAGTCTTTGTGCT<br>CCTCCC       |
| <i>arhgap6-3</i> | <a href="#">ENSAMXG00000007844</a>  | TTCATGACGTGGCT<br>GCGTT-       | AGATCCTCGAACG<br>TGGCGAT       |
| <i>misl3-201</i> | <a href="#">ENSAMXG00000007892</a>  | GTTCCCCACTGTTTT<br>GAGCG       | TTGCGTGCCAGTTT<br>ACGTTG       |
| <i>frmpd4</i>    | <a href="#">ENSAMXG00000007924</a>  | GACTCACCAAGGAG<br>TGCGAA       | GGAGCCAGAGAGG<br>GTAAGGA       |
| <i>pwp2h</i>     | <a href="#">ENSAMXG00000007988</a>  | CCTGTTCACAGCGT<br>CTCCTT       | TCCGTCAGGAGAA<br>TAGGCCA       |
| <i>tmsb4x</i>    | <a href="#">ENSAMXG00000008001</a>  | GAGGTCACCAGCTT<br>CGACAA       | ATGACGCTTGCTTC<br>TCCTGT       |
| <i>tceanc</i>    | <a href="#">ENSAMXG000000025888</a> | AGCTGCAGACCACT<br>GACATC       | CACAGACATGCGG<br>GCAAAAA       |
| <i>rab9a</i>     | <a href="#">ENSAMXG000000025889</a> | GGACGGCTGGTCAC<br>TTTACA       | CCACCTTTGCGCTT<br>CCTCTA       |
| <i>gpm6ba</i>    | <a href="#">ENSAMXG00000008016</a>  | ATGTGGGCAAACCT<br>TGGCTG       | GCGTCGTCCTTGGT<br>CTTGAT       |
| <i>gemin8</i>    | <a href="#">ENSAMXG00000008029</a>  | CTGTCTATGCCCGCT<br>ACTGG       | GTCTGTGCAAAGA<br>ACTGCCG       |
| <i>cbsa</i>      | <a href="#">ENSAMXG00000008046</a>  | CGCATGCTCATCAG<br>AGACGA       | GGCAAAGTGATCC<br>GTCTCCA       |
| <i>cryaa</i>     | <a href="#">ENSAMXG00000008095</a>  | TTTGACTATGACCTC<br>TTCCCCTACGC | GGGGGTAGAGTTA<br>GTCTTGTCGTCAC |
| <i>hsf2bp</i>    | <a href="#">ENSAMXG00000008124</a>  | AGGAGCAGAAGAA<br>GCAGCAG       | ATAAGCGGTATGA<br>GTGCGGG       |
| <i>ankrd10</i>   | <a href="#">ENSAMXG00000008136</a>  | AACGCAAATGGGTT<br>GACTGC       | TCTCCGCATGATC<br>AGGTTCG       |
| <i>ingl</i>      | <a href="#">ENSAMXG00000008150</a>  | CCTGAGGGGACTCC<br>CTTTGA       | AGCTGGACTGTTT<br>GGGTTCG       |
| <i>cars2</i>     | <a href="#">ENSAMXG00000008172</a>  | CCTGGTACAGTTGT<br>GGACCC       | CCCCATGGAGACT<br>CCCAGTA       |
| <i>rab20</i>     | <a href="#">ENSAMXG00000008185</a>  | CCTGCGCCAGAAA<br>AATGAG        | ATGGAAGTACTCA<br>CGACCTG       |
| <i>irs2</i>      | <a href="#">ENSAMXG000000025890</a> | GCTCTGTCTTAGGAT<br>CGCCC       | CCTTGGTGTGTTGTT<br>GGAGCG      |
| <i>lig4</i>      | <a href="#">ENSAMXG00000008192</a>  | TCGCCCTCACAGCG<br>TATTTT       | CGTTGAGGGCGTT<br>GACTACT       |
| <i>fam155a</i>   | <a href="#">ENSAMXG00000008195</a>  | TATACACGGAGGCA<br>CTCCA        | GGGAGATGGGTTT<br>TGGAGCA       |

**Supplementary Table 6.** Oligonucleotide primers used to prepare probes for *in situ* hybridization (ISH) or to amplify *atf3* and *shha* RNA by qualitative RT-PCR.

| Transcript           | Forward primer (5'-3')         | Reverse primer (5'-3')         |
|----------------------|--------------------------------|--------------------------------|
| <i>cbsa</i> (ISH)    | CGCATGCTCATCAGAGACGA           | GGCAAAGTGATCCGTCTCCA           |
| <i>hsf2bp</i> (ISH)  | AGGAGCAGAAGAAGCAGCAG           | ATAAGCGGTATGAGTGCGGG           |
| <i>cbsb</i> (ISH)    | CGATGGTGCGCATCAACAAA           | TGACGATGATGCAGCGGTAA           |
| <i>cryaa</i> (ISH)   | TTTGACTATGACCTCTTCCCCT<br>ACGC | GGGGGTAGAGTTAGTCTTGTCG<br>TCAC |
| <i>shha</i> (RT-PCR) | TATGAAGGCCGGGCCGTGGA           | CCGGGTACGACGTTGCTCGC           |
| <i>atf3</i> (RT-PCR) | ACGCTCGACGACTTTACCAC           | GGTGCTCTCCTTGATCTGCT           |

**Supplementary Table 7.** Oligonucleotide primers used in quantitative real-time RT-PCR determinations.

| Gene name     | Ensembl version gene ID | Forward primer (5'-3')      | Reverse primer (5'-3')   |
|---------------|-------------------------|-----------------------------|--------------------------|
| <i>rps3a</i>  | ENSAMXG00000021691      | TGTTCAACATCCGC<br>AACCTG    | CGGAGGCGATTTTA<br>GTTCCC |
| <i>hif1aa</i> | ENSAMXG00000039550      | GCACTTTACCTACTG<br>CGACG    | TGGCAAACAAGTTG<br>TGGTGA |
| <i>hif1ab</i> | ENSAMXG00000019342      | TACAACAGGGATGT<br>CTGCGG    | TGGGCATTCTGGAT<br>GGCTAA |
| <i>hpx</i>    | ENSAMXG00000002129      | TATGCTTTCAGAGG<br>CCACCA    | TAGGAGAAGACAGC<br>GTCCAC |
| <i>mb</i>     | ENSAMXG00000030396      | AAAGTTGGGAATCG<br>GTCGGA    | CCATGGCCTCGGAT<br>GAGTT  |
| <i>osgn1</i>  | ENSAMXG00000037872      | CCGAACCCGAACAC<br>CCA       | TCCATGACTGAAGC<br>TCGGG  |
| <i>cbsa</i>   | ENSAMXG00000008046      | ACAGATTTCGGCTGA<br>CTGATAAC | GAGAAGAGGTGTGC<br>TCAAAC |
| <i>cbsb</i>   | ENSAMXG00000018461      | CTGGAGCAGTGTGA<br>TGGTAAA   | GGGTCCACTCCAAC<br>AATCTT |
| <i>GAPDH</i>  | ENSAMXG00000039361      | TCCTGAACTCAATG<br>GCAAGC    | TTCTCCAAGCGGAC<br>AGTCAA |

**Supplementary Table 8.** Primers used for PCR amplification and genome walking in the SF and PA-CF *cbসা* gene loci.

| Primer | Primer sequence 5'-3'       |
|--------|-----------------------------|
| Ma171  | GTTATGCCTGAGAAAATGAG-       |
| Ma172  | AAGAACTTAGACATGTAGTT        |
| Ma173  | AAAGTGGATATGCTGGTGGC        |
| Ma174  | AAGTTGAGAAGATCAATGGC        |
| Ma175  | ACGGATCCACCACTCTGAAGCA      |
| Ma176  | GCTCTCGTTTCTCACGGGCGG       |
| Ma177  | TTTGACAGACGGATCCACCACTCT    |
| Ma178  | ACGCTCTCGTTTCTCACGGGC       |
| Ma305  | GAGCAGTGTGATGGTTGTGG        |
| Ma306  | CGGGTAGGATGACCACACAG        |
| Ma307  | CGCATGCTCATCAGAGACGA        |
| Ma308  | GGCAAAGTGATCCGTCTCCA        |
| Ma329  | CGCTCTCTGTCATCTTCCACCATCCG  |
| Ma330  | GCTGATTCTGTCCTTCCACTGCCGCC  |
| Ma331  | TCTCTGCTCCCCCTACTGTTTTGCCCA |
| Ma332  | GGAGACGGATCACTTTGCCCTGGTGGT |
| Ma339  | TCACCAAGACATTCCGGCCTC       |
| Ma340  | AAGCAGTGGTATCAACGCAG        |
| Ma341  | TCGTTGTAAATCGACGGCCA        |
| Ma342  | CACAGTTGGTGTGTTTTTGAGC      |
| Ma343  | CAGCCACCCAGATAAAGCGA        |
| Ma344  | AAGCAGTGGTATCAACGCAGA       |
| Ma345  | TGGGAGAAGAGAAAACAGCGG       |
| Ma346  | ACAGTTGGTGTGTTTTTGAGCTT     |
| Ma347  | CGGCAGTGTGAAGGACAGAA        |
| Ma348  | GAACGCTCTCGTTTCTCACG        |
| Ma349  | AGTGCGAGTACTTCAACGCC        |
| Ma350  | AGACACTGAACGCTCTCGTTT       |
| Ma351  | ACGGCCATGTGTGTTTGTTG        |
| Ma352  | GAGGCCGAATGTCTTGGTGA        |
| Ma353  | CATAATGGCCTGGGGGATAGC       |
| Ma354  | GAAGTACTCGCACTTCGCCA        |
| Ma405  | TGTCAGTGAACAATGTTGATGTT     |
| Ma406  | GGATCAAATACTTCTTGGACTCAC    |
| Ma407  | CAGACAGTAGTGTACAGATTCCCA    |
| Ma408  | CACCGGTTGTTTCAGGTCCAT       |
| Ma409  | AGTAGTGTACAGATTCCCATTGC     |
| Ma410  | TGCATGGATGGGGTGTGTTGT       |
| Ma437  | CGGATGGTGGGAAGATGCAGA       |

|        |                              |
|--------|------------------------------|
| Ma438  | CGTAGTGAGCCAGAGGGTTG         |
| Ma439  | CAGAATCAGCTTGCGGATGG         |
| Ma440  | CTGGTAGGGGTACGGACGAT         |
| Ma441  | CGATGGTGCGCATCAACAAA         |
| Ma442  | TGACGATGATGCAGCGGTAA         |
| Ma443  | GGAAAATTGGAGACACGCCG         |
| Ma444  | ATGATGCAGCGGTAACCCTT         |
| Ma445  | AATCAGCACCCACCTGAACCT        |
| Ma446  | CAGCCACCGCGAAAATGAC          |
| Ma447  | GGATATGCTGCAAGCCGAGA         |
| Ma448  | CGGGGTAAAGTTCACGGGAG         |
| Ma449  | GCCGAGAAAATGGGTAAAGCC        |
| Ma450  | TCCGTTATCGGGGAAGAAGG         |
| Ma451  | TCACCAAGACATTTCGGCCTC        |
| Ma452  | TGTA AACGACGGCCAGTGA         |
| Ma453  | CAGCCACCCAGATAAAGCGA         |
| Ma454  | TTGGGTAAACGCCAGGGTTTT        |
| Ma481  | TGGGTGGGTGGGTGTGAGGGGAGTCTGT |
| Ma482  | GGTGCTCCGAGCCTCCAGGTGCACTT   |
| Ma483  | TCTCGCTGGCCACCTTGTCTCGGTTA   |
| Ma484  | TCCTGTCTGCCCCTTCACTGGCAAGAA  |
| Ma485  | CTGCCAACAGTGCAAGCAAGGTGCAAAA |
| Ma486  | CGTTGTGGACGCAGCCATCCAGCTAAA  |
| Ma487  | TCACCAAGACATTTCGGCCTC        |
| Ma488  | CCATGGCAGTGCCTGAACTA         |
| Ma489  | AGATCGTCCGTACCCCTACC         |
| Ma490  | TGCCAGCTGAAGTGTGCTTA         |
| Ma491  | TGGGGTTTGGTGCTCGTATG         |
| Ma492  | AGACAGCCTTGCACCTACAG         |
| Ma 493 | GGTCCTAAAGCCTGTTGGGT         |
| Ma 494 | TGTTGGTCGTTTCGTCCAATTAT      |
| Ma 495 | TGGACGAACGACCAACATTT         |
| Ma 496 | TGGCACAACCCATATTTGCAT        |
| Ma 497 | AATTGGACGAACGACCAACA         |
| Ma 498 | CTTAGCTGCATATCATTGAA         |
| Ma 499 | AGA ACTCTGACTCAGTTGTACATT    |
| Ma 500 | AGACACTTAATAGGACCACAAACA     |
| Ma 501 | GCCAGTCTGATCTGGTGCTT         |
| Ma 502 | TGGCGGTTACTTATCATGTGT        |
| Ma 503 | TGTAAGAAGAGCAACATTACGGT      |
| Ma 504 | ATCTATCCTGCCCTTGCAC          |
| Ma 505 | GCCTGCTGGACCACTCAA           |
| Ma 506 | GGATCTGAATGATGTCTGTT         |
| Ma 507 | GGTGAAGTGATGGACCTGTT         |
| Ma 508 | GGACTATACCTATTATACT          |



|        |                               |
|--------|-------------------------------|
| Ma 509 | GGGAGCTTTTTAACTGTCAG          |
| Ma 510 | CTACTGAACATTAGTGGTGCA         |
| Ma 511 | ACTGTTCTGTCCAGTACAG           |
| Ma 512 | CGATCAGCATCACTTTACTT          |
| Ma 513 | CCTGTTAGCCCATATCAGAT          |
| Ma 514 | TGACGCACTGATCTACGTGA          |
| Ma 515 | CCTCGATTAGCATATTGTCA          |
| Ma516  | TGCCGCCGGCGTTGAAGTACTCGCACTT  |
| Ma517  | GTTGATGCGCACAAGGGGCGTGTCTCCAA |
| Ma518  | GGCACGTGGGGTTTGGTGCTCGTATGT   |
| Ma519  | ACAGCGCGTTCCACACGTGGCTCGTT    |
| Ma520  | TGGCTGCCTTTACTGCTGCTGCCATGGC  |
| Ma521  | ACCACACAGCAGCCCCTCGTCTCTGATG  |
| Ma522  | GGGTGATTCTTGGTATGGTGACCTTGG   |
| Ma523  | ATGGGGAAGCTCTCTCGGATCTTGGAG   |
| Ma524  | TGCTCAAGTGTGCTTGTGTCAG        |
